# Supplementary material for: Ultrafast-charging and long cycle-life anode materials of TiO2-bronze/nitrogen-doped graphene nanocomposites for high-performance lithium-ion batteries
Source: Royal Society of Chemistry journal article supplement (doi:10.1039/d0ra07733j), 2020-01-01
Supplement: d0ra07733j1.pdf [file d0ra07733j1.pdf]

## Ultrafast-charging and long cycle-life anode materials of TiO<sub>2</sub>-bronze/nitrogen-doped graphene nanocomposites for high-performance lithium-ion batteries

Thanapat Autthawong,<sup>a</sup> Yothin Chimupala,<sup>b,c</sup> Mitsutaka HARUTA,<sup>c</sup> Hiroki KURATA,<sup>c</sup> Tsutomu KIYOMURA,<sup>c</sup> Ai-shui YU,<sup>d</sup> Torranin Chairuangsrī<sup>b</sup> and Thapanee Sarakonsri<sup>\*a,e</sup>

<sup>a</sup> Department of Chemistry, Faculty of Science, Chiang Mai University, Muang, Chiang Mai 50200, Thailand. E-mail: tsarakonsri@gmail.com

<sup>b</sup> Department of Industrial Chemistry, Faculty of Science, Chiang Mai University, Muang, Chiang Mai 50200, Thailand.

<sup>c</sup> Institute for Chemical Research, Kyoto University, Uji, Kyoto 611-0011, Japan.

<sup>d</sup> Department of Chemistry, Fudan University, Yangpu, Shanghai 200438, China.

<sup>e</sup> Material Science Research Center, Faculty of Science, Chiang Mai University, Muang, Chiang Mai 50200, Thailand.

### SUPPLEMENTARY INFORMATION

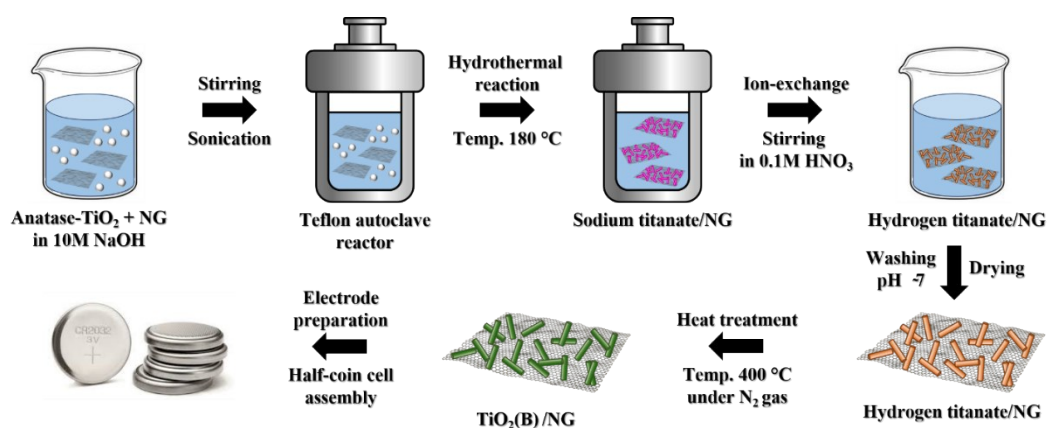

**Fig. S1** Schematic diagram of experimental steps for the synchronous preparation of TNG nanocomposites via the hydrothermal method and followed by heat-treatment process.

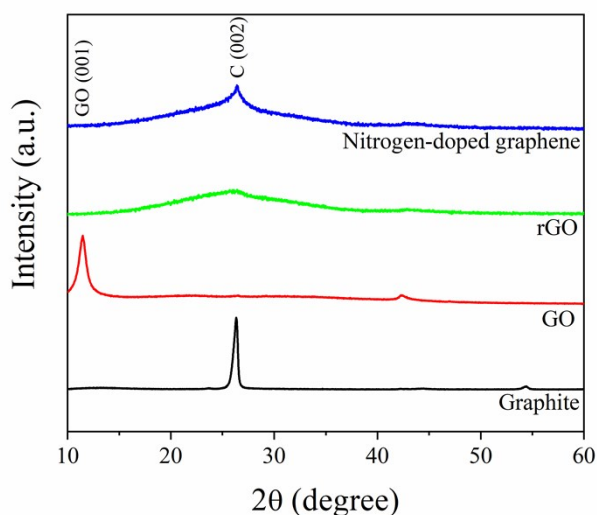

**Fig. S2** Powder XRD patterns measured in a range of 2θ from 10° to 60° of graphite, GO, rGO, and nitrogen-doped graphene.

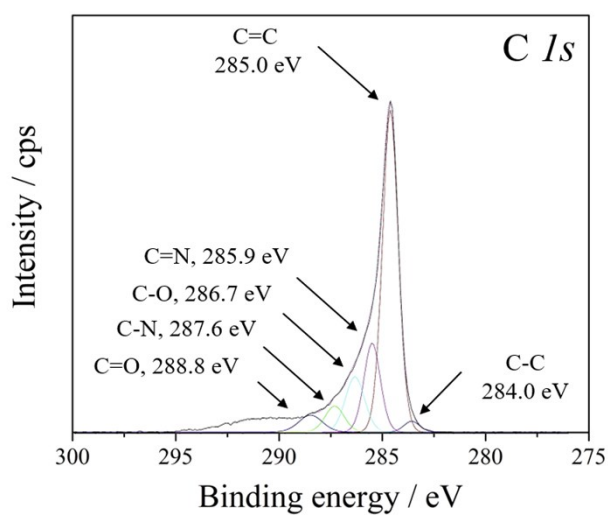

**Fig. S3** the high magnified curve fitting of C 1s XPS spectra

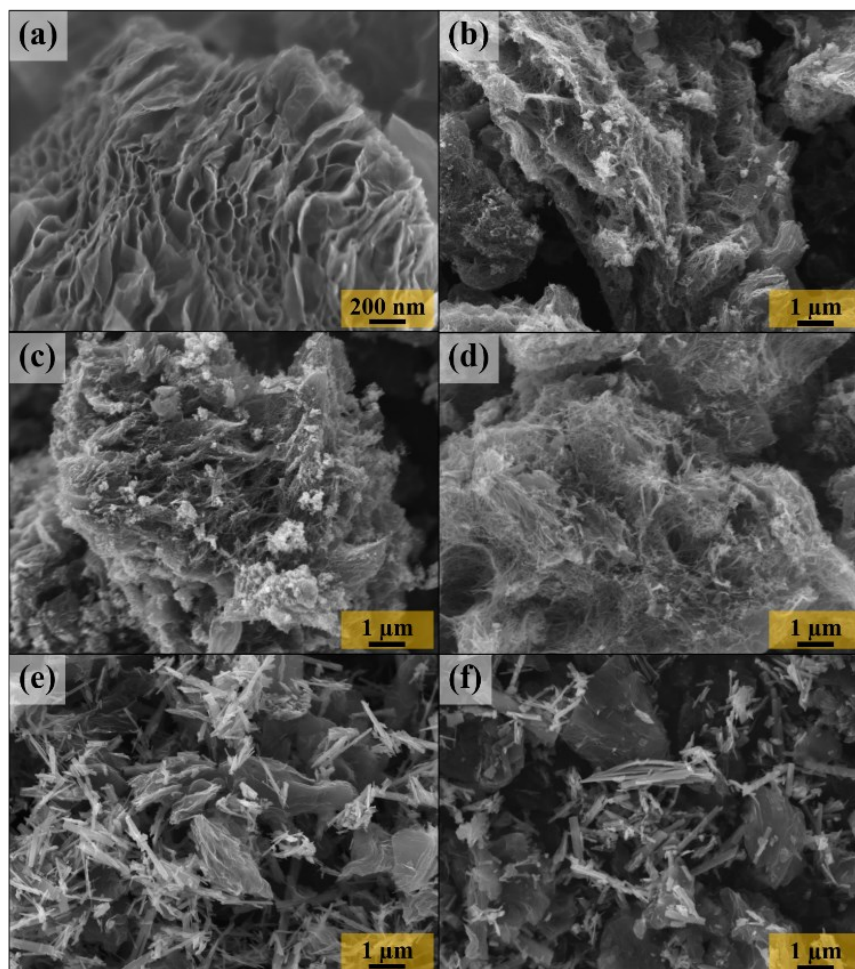

**Fig. S4** SEM images of (a) nitrogen-doped graphene, and TNG products, (b) TNG-3h, (c) TNG-6h, (d) TNG-9h, (e) TNG-12h, and (f) TNG-24h, which were prepared from different hydrothermal reaction times.

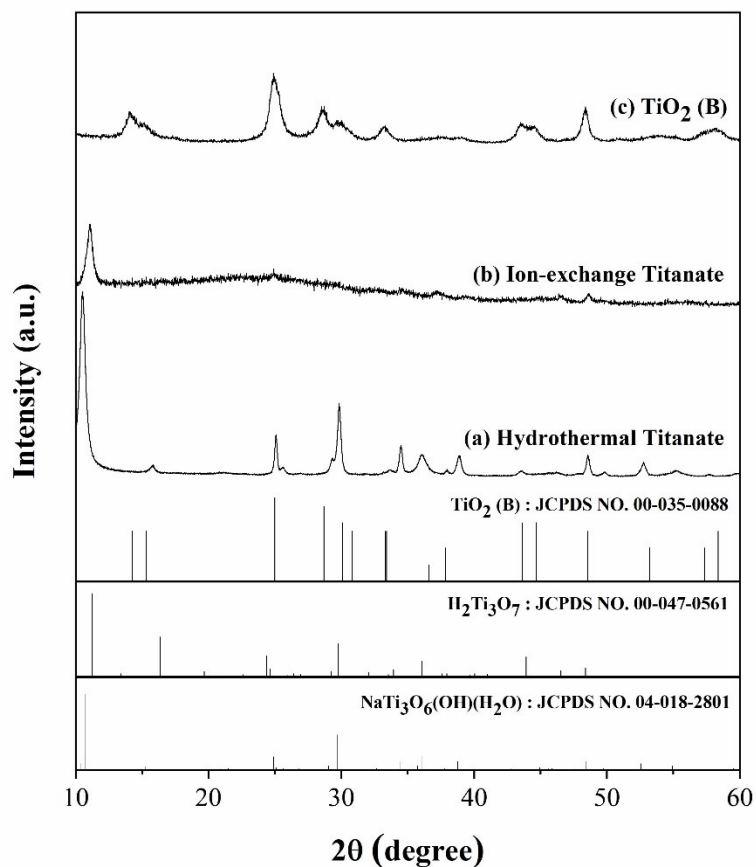

**Fig. S5** the XRD patterns with reference lines for peak assignment: (a) NaTi<sub>3</sub>O<sub>6</sub>(OH)(H<sub>2</sub>O) after the hydrothermal reaction, (b) H<sub>2</sub>Ti<sub>3</sub>O<sub>7</sub> after ion-exchanging, and (c) TiO<sub>2</sub>(B) after heat treatment.

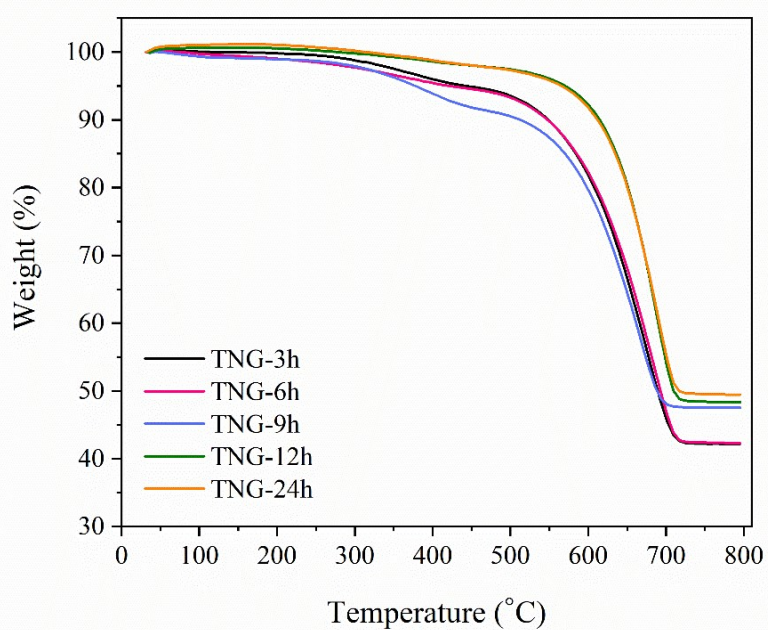

**Fig. S6** Thermogravimetric analysis curves of as-prepared TNG products

**Table S1.** Discharge-charge capacities and coulombic efficiencies of TNG nanocomposite anodes at a current rate of 1C.

| Sample  | Phase and morphology                 | Cycle number          | Discharge (mAh g <sup>-1</sup> ) | Charge (mAh g <sup>-1</sup> ) | Coulombic efficiency (%) |
|---------|--------------------------------------|-----------------------|----------------------------------|-------------------------------|--------------------------|
| TNG-3h  | Anatase nanoparticles on NG          | 1 <sup>st</sup> cycle | 474.01                           | 391.66                        | 82.63                    |
|         |                                      | 2 <sup>nd</sup> cycle | 403.94                           | 374.43                        | 92.69                    |
|         |                                      | 3 <sup>rd</sup> cycle | 385.63                           | 364.23                        | 94.45                    |
| TNG-6h  | Anatase nanosheets on NG             | 1 <sup>st</sup> cycle | 347.19                           | 288.49                        | 83.09                    |
|         |                                      | 2 <sup>nd</sup> cycle | 300.03                           | 280.34                        | 93.44                    |
|         |                                      | 3 <sup>rd</sup> cycle | 289.26                           | 274.09                        | 94.76                    |
| TNG-9h  | TiO <sub>2</sub> (B) nanotubes on NG | 1 <sup>st</sup> cycle | 430.13                           | 361.20                        | 83.97                    |
|         |                                      | 2 <sup>nd</sup> cycle | 375.98                           | 354.43                        | 94.27                    |
|         |                                      | 3 <sup>rd</sup> cycle | 381.38                           | 364.83                        | 95.66                    |
| TNG-12h | TiO <sub>2</sub> (B) nanorods on NG  | 1 <sup>st</sup> cycle | 400.99                           | 342.24                        | 85.35                    |
|         |                                      | 2 <sup>nd</sup> cycle | 357.07                           | 338.41                        | 94.77                    |
|         |                                      | 3 <sup>rd</sup> cycle | 350.68                           | 336.96                        | 96.09                    |
| TNG-24h | TiO <sub>2</sub> (B) nanorods on NG  | 1 <sup>st</sup> cycle | 634.54                           | 527.42                        | 83.12                    |
|         |                                      | 2 <sup>nd</sup> cycle | 550.14                           | 507.79                        | 92.30                    |
|         |                                      | 3 <sup>rd</sup> cycle | 525.57                           | 494.07                        | 94.01                    |
